# Supplementary material
Source: Springer Nature journal article supplement (https://www.springermedizin.de/resource/supplementary/12916_2012_718_MOESM8_ESM.pdf/9598740)

**a** muscle inflammatory cells

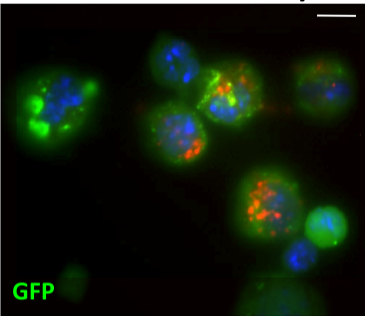

**b** spleen

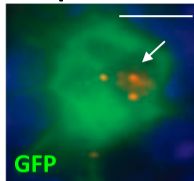

**c** brain

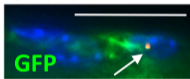

**d** brain

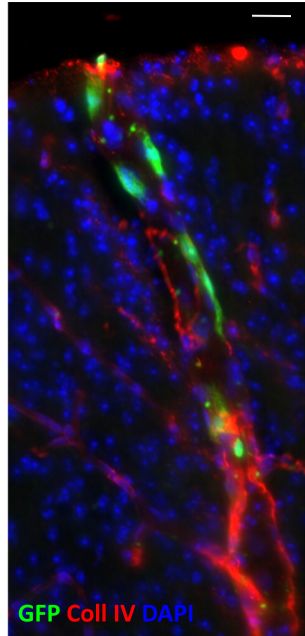

**e** brain

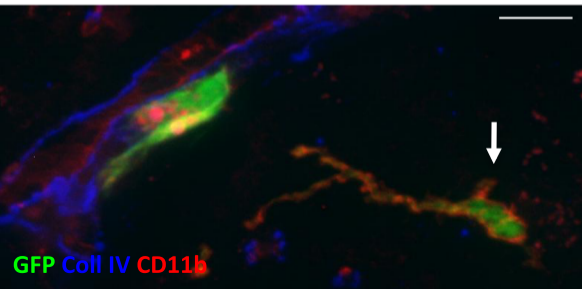

Supplement: MOESM8 [file 9598740]
